# Supplementary material
Source: PubMed Central journal article supplement (PMC6641128)
Supplement: ao6b00504_si_001.pdf [file ao6b00504_si_001.pdf]

Electronic Supplementary Information for

**Enhanced Lithium ion storage performance of tannic acid in the  
electrolytes of LiTFSI**

Zheng Xu<sup>a</sup>, Haijun Ye<sup>a</sup>, Hongqin Li<sup>a</sup>, Yazhou Xu<sup>a</sup>, Chuanyi Wang<sup>c</sup>, Jiao Yin<sup>c\*</sup>, Hui Zhu<sup>a,b\*</sup>

<sup>a</sup>College of Chemistry, Jiangxi Provincial Key Laboratory of New Energy Chemistry, Nanchang University, 999 Xuefu Avenue, Nanchang, 330031, China.

<sup>b</sup>State Key Laboratory of Electroanalytical Chemistry, Changchun Institute of Applied Chemistry, Chinese Academy of Sciences, No. 5625, Renmin Street, Changchun, 130022, China.

<sup>c</sup>Key Laboratory of Functional Materials and Devices for Special Environments, Xinjiang Technical Institute of Physics & Chemistry, Chinese Academy of Sciences, 40-1 South Beijing Road, Urumqi, Xinjiang 830011, China

\*Corresponding author. Tel.: 86-991-3835879. E-mail address: yinjiao@ms.xjb.ac.cn (Jiao Yin)

\*Corresponding author: Tel.: +86 18279120246. E-mail: huizhu@ncu.edu.cn (Hui Zhu)

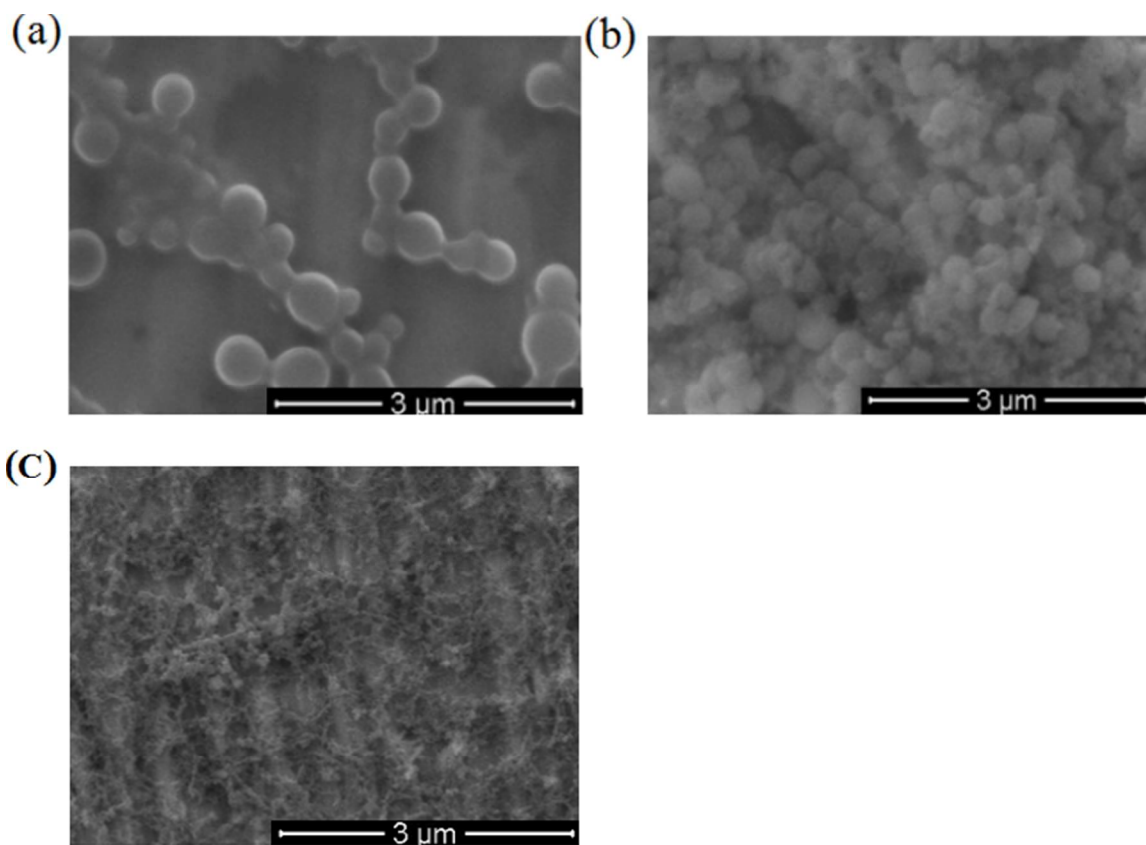

**Figure S1.** The SEM of the tannic acid (a) before (b) after lithiation (C) after 30 cycles

## II. Electrochemical tests

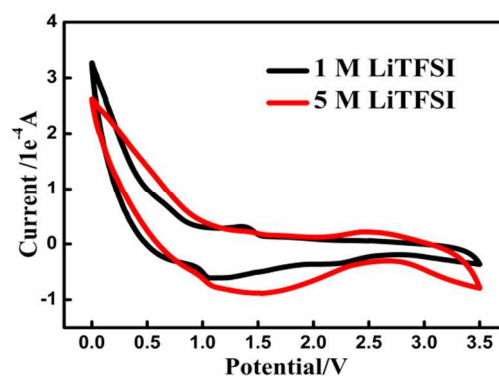

**Figure S2.** The CV curves of TA in 1 M LiTFSI and 5 M LiTFSI within the potential range from 3.5 V to 0 V (vs.  $\text{Li}^+/\text{Li}$ ) at a scan rate of  $1 \text{ mV s}^{-1}$ .

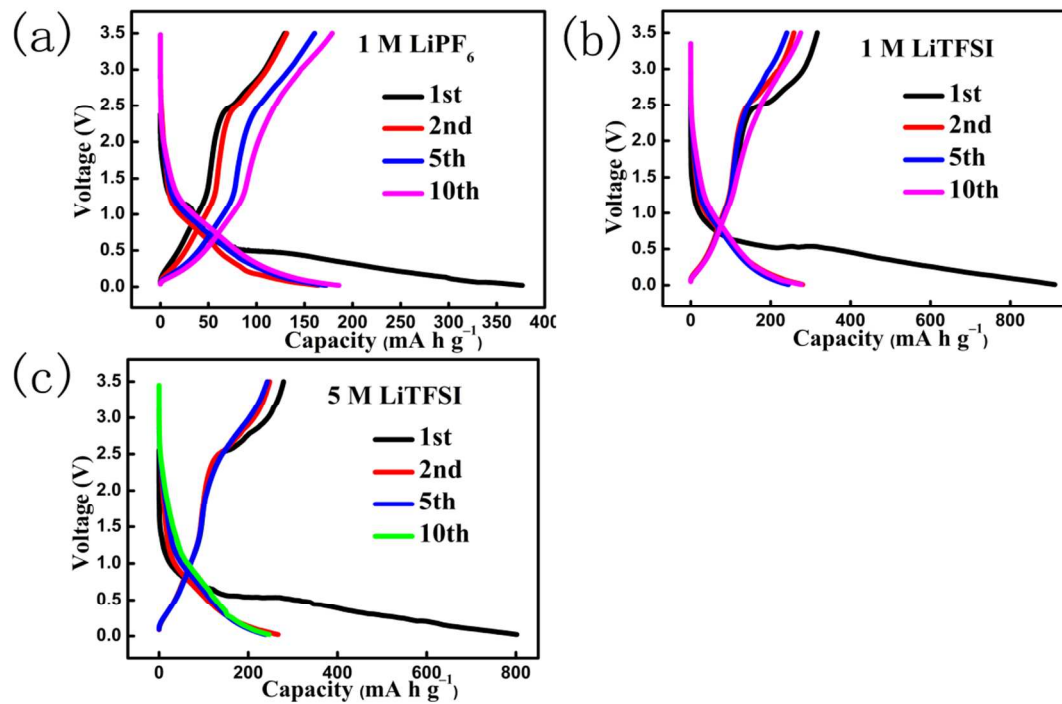

**Figure S3.** The charge/discharge profiles of TA in different electrolytes ((a) 1 M LiPF<sub>6</sub>, (b) 1 M LiTFSI, (c) 5 M LiTFSI) within the potential range (0-3.5 V vs. Li<sup>+</sup>/Li) at a current density of 10 mA g<sup>-1</sup>.

**Table S1.** The fitted parameters results of Figure. 6. (internal resistance ( $R_e$ ), constant phase element (CPE-1), the SEI film resistance ( $R_s$ ), non-ideal constant phase element (CPE-2), the charge transfer resistance ( $R_{ct}$ ) and the Warburg impedance ( $Z_w$ )).

| Formula of electrolyte | $R_e(\Omega)$ | CPE-1                  | $R_s(\Omega)$          | CPE-2                  | $R_{ct}(\Omega)$ | $Z_w(\Omega)$           |
|------------------------|---------------|------------------------|------------------------|------------------------|------------------|-------------------------|
| 1 M LiPF <sub>6</sub>  | 8.462         | $2.742 \times 10^{-5}$ | $5.183 \times 10^{16}$ | $2.663 \times 10^{-3}$ | 408.5            | $5.154 \times 10^{-13}$ |
| 1 M LiTFSI             | 29.15         | $3.459 \times 10^{-5}$ | $1.082 \times 10^4$    | $1.484 \times 10^{-3}$ | 145.7            | $2.534 \times 10^{-20}$ |
| 3 M LiTFSI             | 59.69         | $2.393 \times 10^{-5}$ | $1.507 \times 10^3$    | $1.49 \times 10^{-3}$  | 82.47            | $4.268 \times 10^{-16}$ |
| 5 M LiTFSI             | 111.3         | $7.228 \times 10^{-5}$ | $2.133 \times 10^{14}$ | $1.01 \times 10^{-3}$  | 202.3            | $5.061 \times 10^{-16}$ |
